# Supplementary material
Source: Atypon-hosted journal article supplement (https://sm.blackgold.org/Record/132832/DownloadSupplementalFile?fileId=145)
Supplement: DownloadSupplementalFile [file DownloadSupplementalFile]

## The online community for reading groups

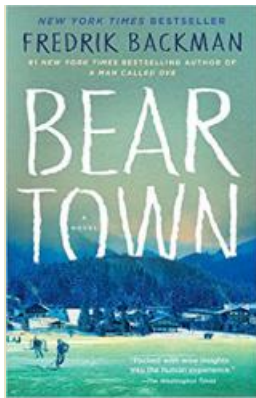

About the Book  
Excerpt  
Discussion Questions  
Reading Guide (PDF)

## Discussion Questions

## Beartown

by Fredrik Backman

1. What does hockey mean to the people of Beartown? What does winning the semifinal mean for the town's future?
2. The town and the parents of the Beartown junior hockey team place great expectations on the shoulders of 17-year-old boys. How does this pressure affect the boys? Have the club's leaders (David, Sune, Peter and the others) prepared the boys to deal with this pressure? Have the boys' parents?
3. How do issues related to social class affect the people of Beartown and the hockey club? Do those who live in the Hollow have a different world view from those who live in the Heights? Does hockey cut through class distinctions or reinforce them?
4. What does Kira's role as a working mother, and her job as a lawyer, mean to her? How does her job affect the way others treat her? Consider this passage from the novel:  
  
"Not a second has passed since she had children without her feeling like a bad mother. For everything. For not understanding, for being impatient, for not knowing everything, not making better packed lunches, for still wanting more out of life than just being a mother. She hears other women in Beartown sigh behind her back: 'Yes, but she has a *full-time* job, you know. Can you imagine?'" (p. 63)
5. How do Peter and Kira complement each other in their relationship? How does he make up for her weaknesses, and vice versa? Do you think they have a solid marriage? A happy one?
6. Peter loves hockey because it demands his all, his everything. What does hockey demand from each of the characters in the book? What does it take from them?
7. There are many different parents and styles of parenting portrayed in the book. Which parents do you think are the most successful at preparing their children for the real world? Why?
8. Consider this sentiment echoed throughout the book: "What is a community? It is the sum total of our choices." (p. 312) By this definition, how do the townspeople of Beartown ultimately measure up? What kind of community have they built?
9. Several characters must find the courage to go against the grain of the tight-knit Beartown community. What is at stake for each character who does so, and is it worth it for them in the end?
10. Discuss the difference between male and female roles in the small village of Beartown. What is expected of the girls and women vs. the

## Find a Book

VIEW ALL » | BY AUTHOR » | BY GENRE » | BY DATE

[readinggroupguides.com on Face](#)[readinggroupguides.com on Twit](#)[readinggroupguides on Instagram](#)

boys and men? Which characters break these expectations, and what are the consequences of doing so?

11. Consider the importance of names and nicknames throughout the novel. How does the lack of first names for “Kevin’s mother,” “Kevin’s father,” “David’s girlfriend,” and Benji’s “bass player” change your impression of them? What effect does calling Maya “the young woman” have on Maya and her own narrative? How does she start to reclaim her own story?

12. In the course of the novel, we see that playing on a sports team teaches young people values like loyalty, responsibility and commitment. But we also see instances of exclusion, aggression, and entitlement. Are there certain behaviors that are rewarded in a sports competition but considered inappropriate in daily life? Give examples. Which characters in the book have difficulty navigating this?

13. The events of the novel force the junior boys to grow up quickly as they are faced with very adult realities. What kind of man does Amat become over the course of the book? What do his actions reveal about him? What kind of man does Bobo become? Kevin? Benji?

14. Maya is surprised by how easily she can start to lie to her best friend, Ana, and keep secrets from her. How do each character’s secrets affect his or her relationship with loved ones? Consider the secrets between friends (Maya and Ana, Kevin and Benji, Amat and Zach), as well as those between parents and children, and husbands and wives.

15. How does Maya’s final act shape her future? How does it shape Kevin’s? Do you think a form of justice is achieved? Why or why not?

16. Why do you think Benji chooses to stay in Beartown and play for Sune’s A-Team instead of following the others to Hed? Was his choice affected by his relationship with the bass player?

17. At the end of the novel, do you think the tradition of the Beartown Hockey Club continues? Has its fundamental character changed? How do you think it will change going forward?

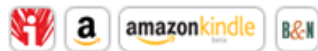

**Beartown**  
by **Fredrik Backman**

**Publication Date:** February 6, 2018

**Genres:** **Fiction**

**Paperback:** 432 pages

**Publisher:** Washington Square Press

**ISBN-10:** 150116077X

**ISBN-13:** 9781501160776
